# Supplementary material for: The BCL-2 Inhibitor Venetoclax Augments Immune Effector Function Mediated by Fas Ligand, TRAIL, and Perforin/Granzyme B, Resulting in Reduced Plasma Viremia and Decreased HIV Reservoir Size during Acute HIV Infection in a Humanized Mouse Model
Source: PubMed Central journal article supplement (PMC9769373; doi:10.1128/jvi.01730-22), 2022-11-30
Supplement: jvi.01730-22-s0001.pdf [file jvi.01730-22-s0001.pdf]

# Supplemental Figure 1

**A**

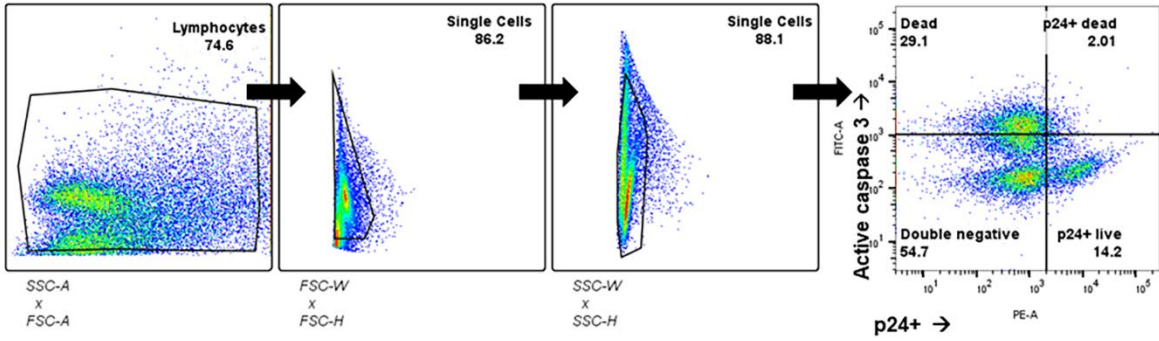

**B**

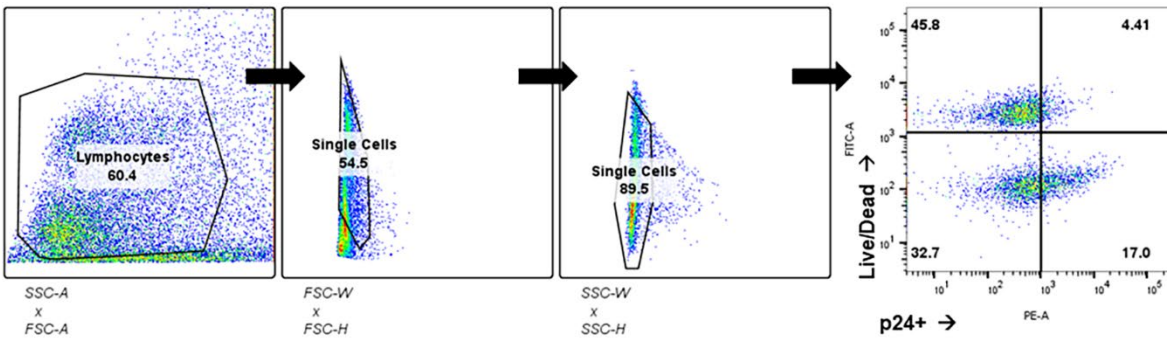

**C**

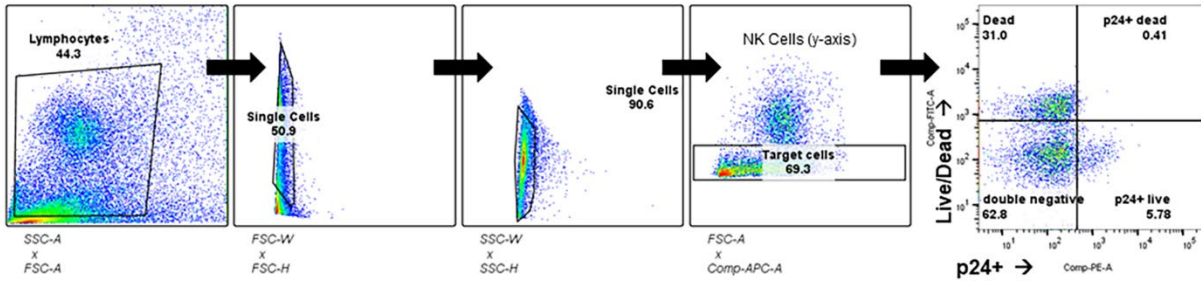

**D**

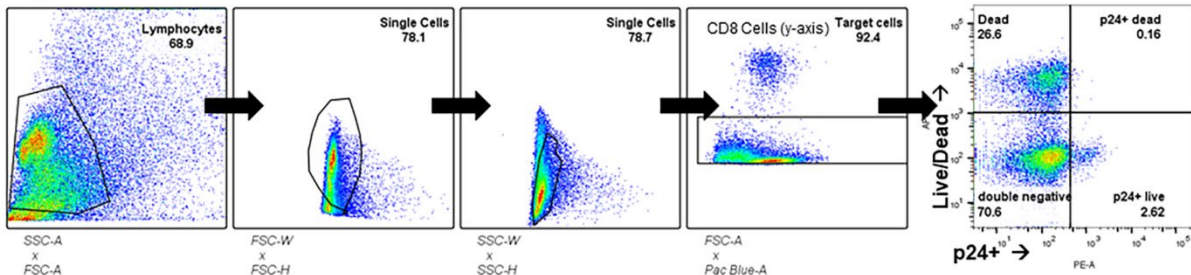

### **Supplemental figure 1: Gating strategy for figures 1-4**

**A** Gating strategy for CH11 and SKT experiments. **B** Gating strategy for Perforin/Granzyme B experiments. **C** Gating strategy for NK experiments. NK cells were stained with an APC conjugated antibody and excluded from the target cell population (panel 4). **D** Gating strategy for CD8 experiments. CD8 cells were stained with a PacBlue conjugated antibody and excluded from the target cell population (panel 4).
